# Supplementary material
Source: PubMed Central journal article supplement (PMC5815029)
Supplement: jamacardiol-2-635-s001.pdf [file jamacardiol-2-635-s001.pdf]

## Supplementary Online Content

Chen J, Budoff MJ, Reilly MP, et al; for the CRIC Investigators. Coronary artery calcification and risk of cardiovascular disease and death among patients with chronic kidney disease. *JAMA Cardiol.* doi:10.1001/jamacardio.2017.0363 Published online March 22, 2017

- eFigure 1.** Frequency of Estimated-Glomerular Filtration Rate (eGFR, Bar Chart) and Median (Inter-Quartile Range) of Coronary Artery Calcification Score (Boxplot) According to eGFR Categories
- eFigure 2.** Kaplan-Meier Cumulative Event Rates of Myocardial Infarction, Heart Failure, Composite Cardiovascular Disease, and All-cause Mortality According to Coronary Artery Calcification among All CRIC Study Participants
- eFigure 3.** Kaplan-Meier Cumulative Event Rates of Composite Cardiovascular Disease and All-cause Mortality According to ACC/AHA-Atherosclerotic Cardiovascular Disease Risk Score among CRIC Study Participants without History of Cardiovascular Disease
- eTable 1.** Multivariable-adjusted Hazard Ratios of Cardiovascular Disease and Death Associated with Coronary Artery Calcification among CRIC Study Participants with History of Cardiovascular Disease
- eTable 2.** Multivariable-adjusted Hazard Ratios of Cardiovascular Disease and Death Associated with Coronary Artery Calcification among All CRIC Study Participants
- eTable 3.** Improvement in Prediction of Cardiovascular Disease and Mortality by Adding Coronary Artery Calcification to Cardiovascular Risk Factors among CRIC Study Participants without History of Cardiovascular Disease

This supplementary material has been provided by the authors to give readers additional information about their work.

**eFigure 1.** Frequency of Estimated-Glomerular Filtration Rate (eGFR, Bar Chart) and Median (Inter-Quartile Range) of Coronary Artery Calcification Score (Boxplot) According to eGFR Categories

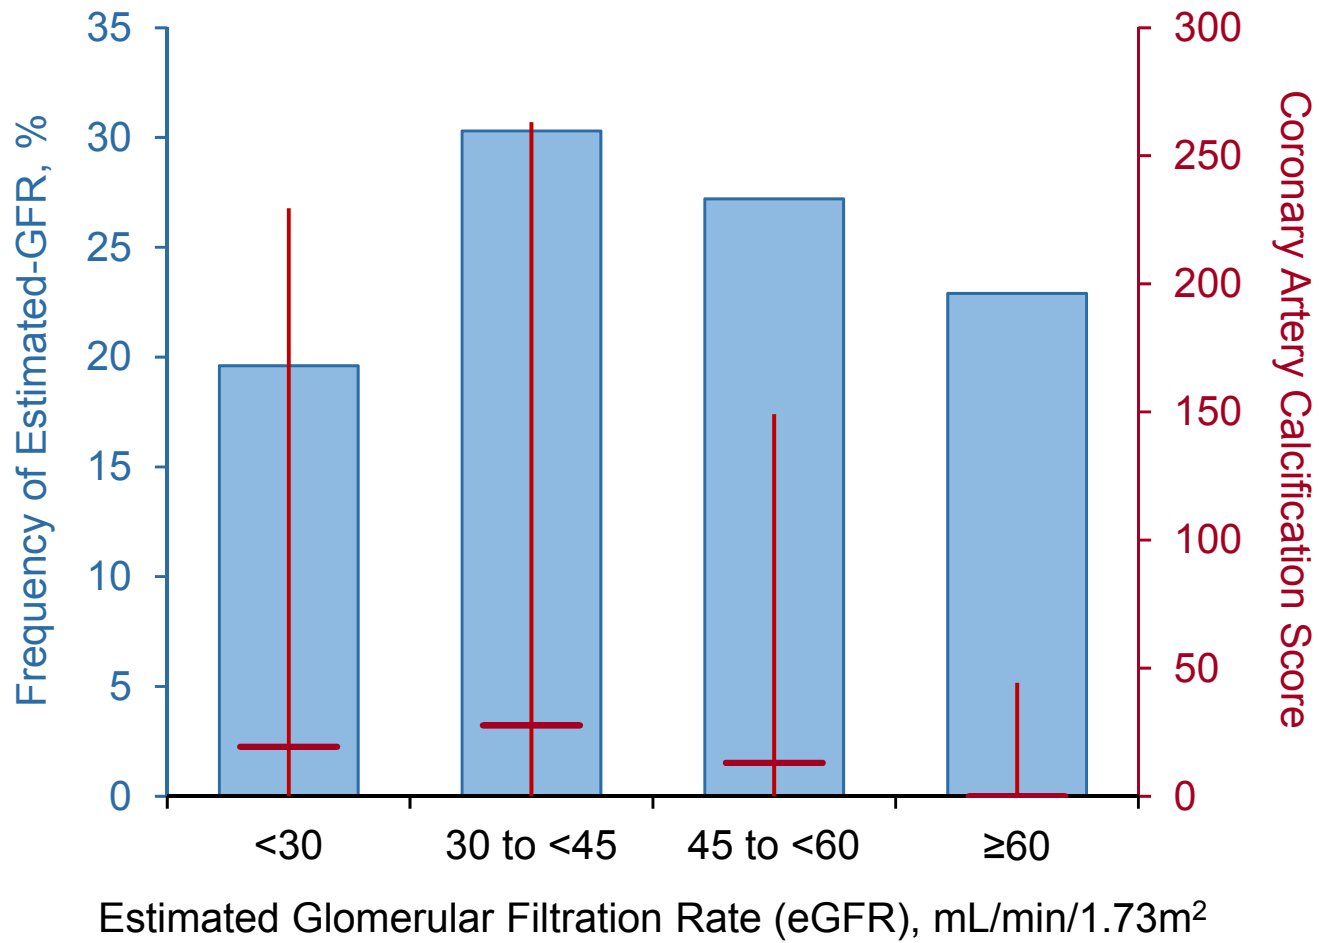

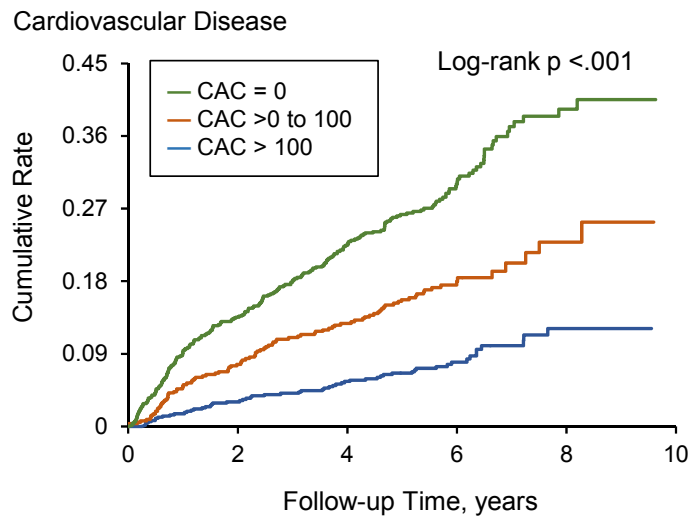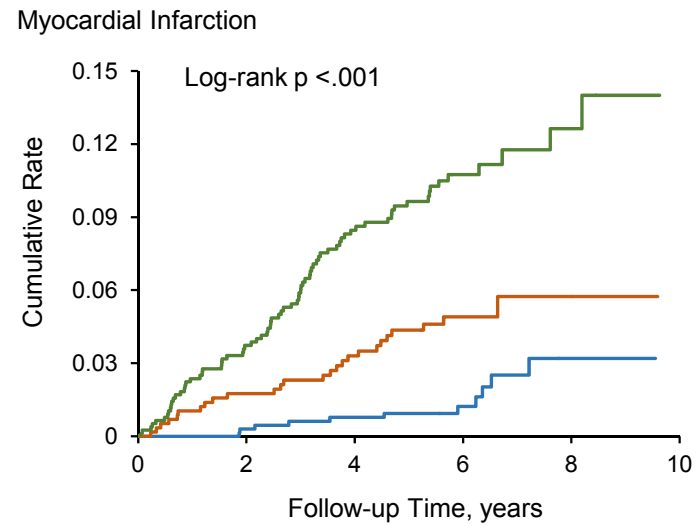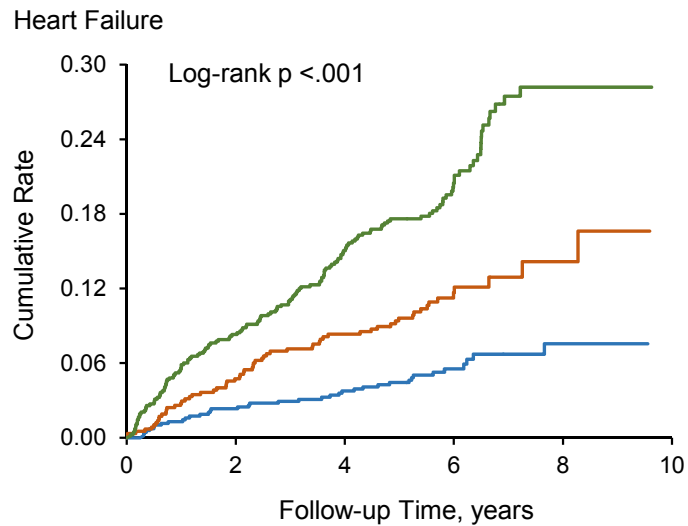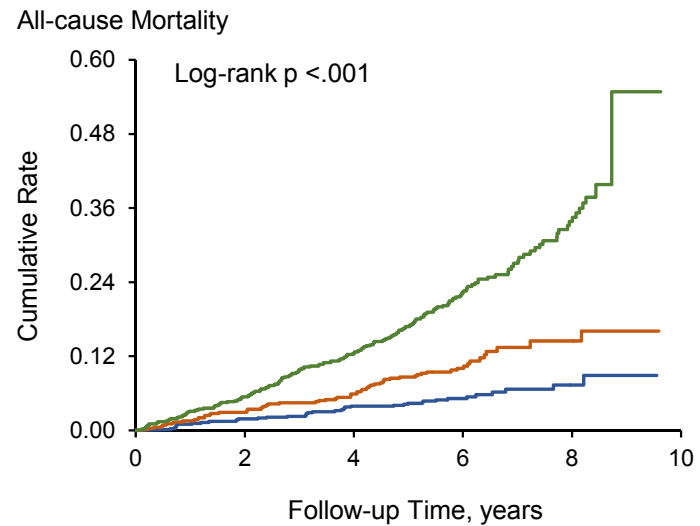

**eFigure 2.** Kaplan-Meier Cumulative Event Rates of Cardiovascular Disease, Myocardial Infarction, Heart Failure, and All-cause Mortality According to Coronary Artery Calcification among All CRIC Study Participants

**eFigure 3.** Kaplan-Meier Cumulative Event Rates of Cardiovascular Disease and All-cause Mortality According to ACC/AHA-Atherosclerotic Cardiovascular Disease Risk Score among CRIC Study Participants without History of Cardiovascular Disease

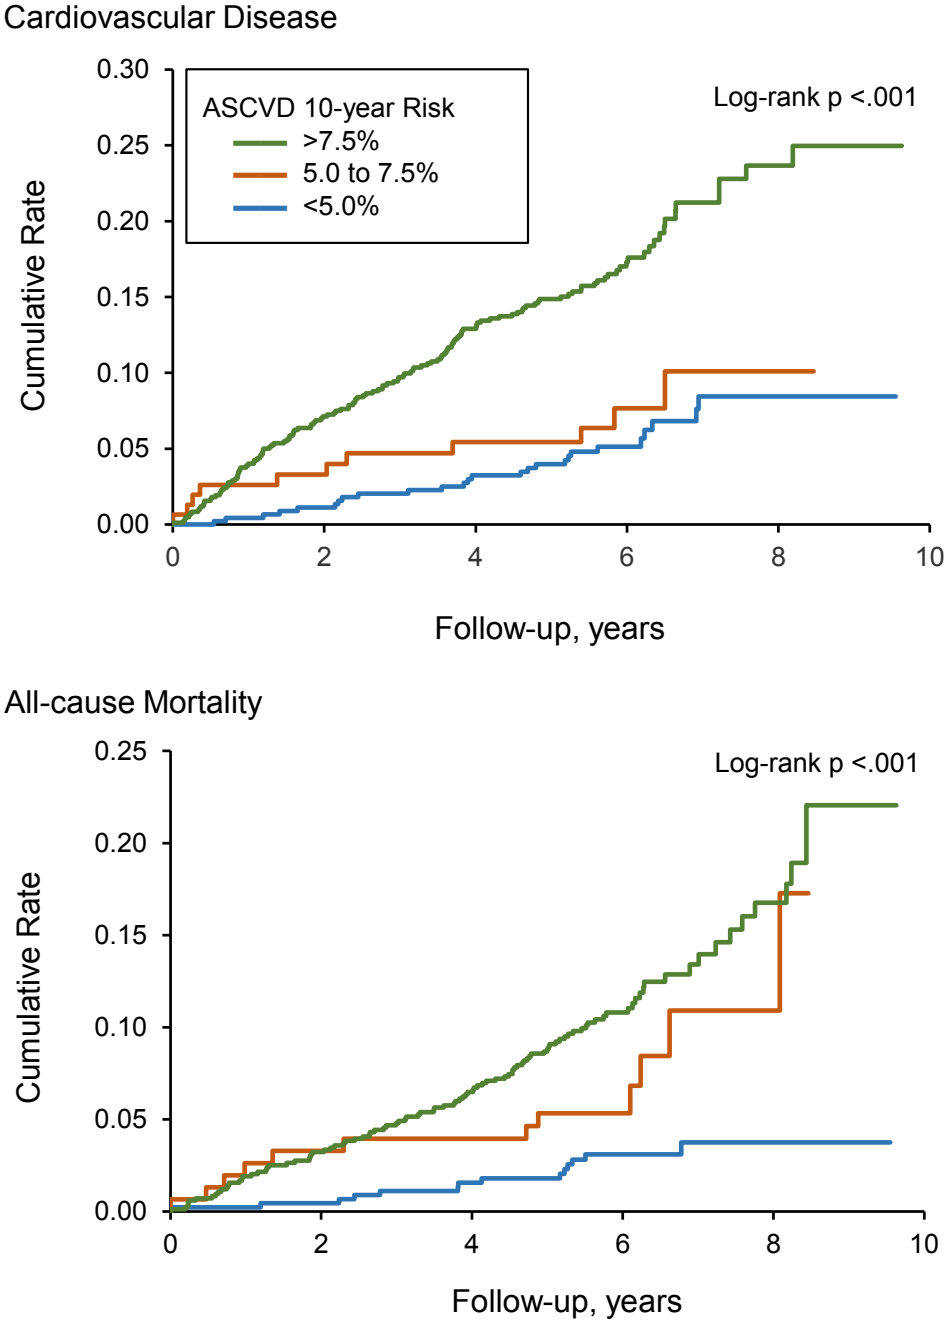

**eTable 1.** Multivariable-adjusted Hazard Ratios of Cardiovascular Disease and Death Associated with Coronary Artery Calcification among CRIC Study Participants with History of Cardiovascular Disease

| CAC categories                | Model 1           |                   | Model 2           |                   | Model 3           |                   |
|-------------------------------|-------------------|-------------------|-------------------|-------------------|-------------------|-------------------|
|                               | HR (95% CI)       | p-value for trend | HR (95% CI)       | p-value for trend | HR (95% CI)       | p-value for trend |
| <b>Cardiovascular disease</b> |                   |                   |                   |                   |                   |                   |
| CAC=0                         | 1.00 (Reference)  |                   | 1.00 (Reference)  |                   | 1.00 (Reference)  |                   |
| CAC>0-100                     | 1.63 (0.94, 2.81) | <.001             | 1.28 (0.73, 2.25) | .02               | 1.17 (0.65, 2.11) | .50               |
| CAC>100                       | 2.55 (1.54, 4.22) |                   | 1.87 (1.11, 3.16) |                   | 1.36 (0.78, 2.36) |                   |
| Per 1 SD log CAC*             | 1.53 (1.28, 1.83) | <.001             | 1.40 (1.16, 1.69) | <.001             | 1.29 (1.05, 1.58) | .02               |
| <b>Myocardial infarction</b>  |                   |                   |                   |                   |                   |                   |
| CAC=0                         | 1.00 (Reference)  |                   | 1.00 (Reference)  |                   | 1.00 (Reference)  |                   |
| CAC>0-100                     | 2.18 (0.45, 10.6) | .009              | 1.70 (0.34, 8.49) | .08               | 1.68 (0.34, 8.37) | .09               |
| CAC>100                       | 5.59 (1.31, 23.8) |                   | 3.58 (0.81, 15.8) |                   | 3.43 (0.81, 14.6) |                   |
| Per 1 SD log CAC*             | 2.53 (1.60, 4.00) | <.001             | 2.16 (1.33, 3.51) | .002              | 2.10 (1.34, 3.29) | .001              |
| <b>Heart failure</b>          |                   |                   |                   |                   |                   |                   |
| CAC=0                         | 1.00 (Reference)  |                   | 1.00 (Reference)  |                   | 1.00 (Reference)  |                   |
| CAC>0-100                     | 1.36 (0.72, 2.56) | .009              | 0.99 (0.52, 1.91) | .09               | 0.90 (0.45, 1.81) | 0.66              |
| CAC>100                       | 2.20 (1.24, 3.93) |                   | 1.58 (0.87, 2.87) |                   | 1.13 (0.62, 2.07) |                   |
| Per 1 SD log CAC*             | 1.50 (1.21, 1.85) | <.001             | 1.36 (1.08, 1.70) | .008              | 1.19 (0.94, 1.50) | 0.15              |
| <b>All-cause mortality</b>    |                   |                   |                   |                   |                   |                   |
| CAC=0                         | 1.00 (Reference)  |                   | 1.00 (Reference)  |                   | 1.00 (Reference)  |                   |
| CAC>0-100                     | 1.45 (0.73, 2.89) | <.001             | 1.38 (0.66, 2.87) | <.001             | 1.60 (0.76, 3.38) | .005              |
| CAC>100                       | 2.87 (1.55, 5.33) |                   | 2.90 (1.48, 5.67) |                   | 2.60 (1.34, 5.05) |                   |
| Per 1 SD log CAC*             | 1.72 (1.39, 2.14) | <.001             | 1.76 (1.40, 2.23) | <.001             | 1.63 (1.29, 2.07) | <.001             |

CAC = coronary artery calcification; HR = hazard ratio; CI = confidence interval; SD = standard deviation.

Model 1: Adjusted for age, gender, race, and clinic sites; Model 2: Model 1 plus ACC/AHA atherosclerotic cardiovascular disease risk factors: age, gender, race, clinical site, total cholesterol, high-density lipoprotein cholesterol, systolic blood pressure, antihypertensive treatment, current cigarette smoking, and diabetes status; Model 3: Model 2 plus education, body-mass index, physical activity, log-high sensitivity C-reactive protein, hemoglobin A1c, phosphate, log-high sensitivity troponin T, log-N-terminal pro-B-type natriuretic peptide, log-fibroblast growth factor-23, estimated-glomerular filtration rate, and log-24 hour urinary protein.

\* One standard deviation (SD) log CAC = 2.8

**eTable 2.** Multivariable-adjusted Hazard Ratios of Cardiovascular Disease and Death Associated with Coronary Artery Calcification among All CRIC Study Participants

| CAC categories                | Model 1           |                   | Model 2           |                   | Model 3           |                   |
|-------------------------------|-------------------|-------------------|-------------------|-------------------|-------------------|-------------------|
|                               | HR (95% CI)       | p-value for trend | HR (95% CI)       | p-value for trend | HR (95% CI)       | p-value for trend |
| <b>Cardiovascular disease</b> |                   |                   |                   |                   |                   |                   |
| CAC=0                         | 1.00 (Reference)  |                   | 1.00 (Reference)  |                   | 1.00 (Reference)  |                   |
| CAC>0-100                     | 2.05 (1.47, 2.87) | <.001             | 1.60 (1.14, 2.25) | <.001             | 1.32 (0.91, 1.90) | .07               |
| CAC>100                       | 3.33 (2.40, 4.62) |                   | 2.19 (1.57, 3.05) |                   | 1.52 (1.06, 2.19) |                   |
| Per 1 SD log CAC*             | 1.78 (1.57, 2.02) | <.001             | 1.50 (1.32, 1.72) | <.001             | 1.38 (1.20, 1.59) | <.001             |
| <b>Myocardial infarction</b>  |                   |                   |                   |                   |                   |                   |
| CAC=0                         | 1.00 (Reference)  |                   | 1.00 (Reference)  |                   | 1.00 (Reference)  |                   |
| CAC>0-100                     | 2.46 (1.20, 5.06) | <.001             | 2.01 (0.97, 4.16) | .002              | 1.31 (0.62, 2.78) | .03               |
| CAC>100                       | 4.96 (2.50, 9.83) |                   | 3.22 (1.60, 6.46) |                   | 2.19 (1.09, 4.39) |                   |
| Per 1 SD log CAC*             | 2.24 (1.73, 2.90) | <.001             | 1.84 (1.41, 2.41) | <.001             | 1.69 (1.28, 2.23) | <.001             |
| <b>Heart failure</b>          |                   |                   |                   |                   |                   |                   |
| CAC=0                         | 1.00 (Reference)  |                   | 1.00 (Reference)  |                   | 1.00 (Reference)  |                   |
| CAC>0-100                     | 1.91 (1.26, 2.89) | <.001             | 1.46 (0.96, 2.22) | <.001             | 1.23 (0.78, 1.96) | .01               |
| CAC>100                       | 3.28 (2.20, 4.89) |                   | 2.17 (1.45, 3.25) |                   | 1.76 (1.15, 2.69) |                   |
| Per 1 SD log CAC*             | 1.77 (1.51, 2.07) | <.001             | 1.49 (1.27, 1.75) | <.001             | 1.42 (1.19, 1.69) | <.001             |
| <b>All-cause mortality</b>    |                   |                   |                   |                   |                   |                   |
| CAC=0                         | 1.00 (Reference)  |                   | 1.00 (Reference)  |                   | 1.00 (Reference)  |                   |
| CAC>0-100                     | 1.57 (1.05, 2.36) | <.001             | 1.29 (0.85, 1.97) | <.001             | 1.24 (0.79, 1.95) | .01               |
| CAC>100                       | 2.96 (2.02, 4.32) |                   | 2.40 (1.62, 3.54) |                   | 1.75 (1.15, 2.66) |                   |
| Per 1 SD log CAC*             | 1.68 (1.45, 1.95) | <.001             | 1.56 (1.34, 1.83) | <.001             | 1.35 (1.15, 1.60) | <.001             |

CAC = coronary artery calcification; HR = hazard ratio; CI = confidence interval; SD = standard deviation.

Model 1: Adjusted for age, gender, race, and clinic sites; Model 2: Model 1 plus ACC/AHA atherosclerotic cardiovascular disease risk factors: age, gender, race, clinical site, total cholesterol, high-density lipoprotein cholesterol, systolic blood pressure, treatment for hypertension (any antihypertensive medications), current cigarette smoking, and diabetes status; Model 3: Model 2 plus education, body-mass index, physical activity, log-high sensitivity C-reactive protein, hemoglobin A1c, phosphate, log-high sensitivity troponin T, log-N-terminal pro-B-type natriuretic peptide, log-fibroblast growth factor-23, estimated-glomerular filtration rate, and log-24 hour urinary protein using backward elimination.

\* One standard deviation (SD) log CAC = 2.8



**eTable 3.** Improvement in Prediction of Cardiovascular Disease and Mortality by Adding Coronary Artery Calcification to Cardiovascular Risk Factors among CRIC Study Participants without History of Cardiovascular Disease

| Events                        | Model 1                  |                       |                                         |                                    |                   | Model 2                  |                       |                                         |                                    |                   | Model 3                  |                       |                                         |                                    |                   |
|-------------------------------|--------------------------|-----------------------|-----------------------------------------|------------------------------------|-------------------|--------------------------|-----------------------|-----------------------------------------|------------------------------------|-------------------|--------------------------|-----------------------|-----------------------------------------|------------------------------------|-------------------|
|                               | C-statistics without CAC | C-statistics with CAC | Change in C-statistics with/without CAC | Continuous NRI for event* (95% CI) | IDI for event*    | C-statistics without CAC | C-statistics with CAC | Change in C-statistics with/without CAC | Continuous NRI for event* (95% CI) | IDI for event*    | C-statistics without CAC | C-statistics with CAC | Change in C-statistics with/without CAC | Continuous NRI for event* (95% CI) | IDI for event*    |
| <b>Cardiovascular disease</b> | 0.66 (0.64, 0.78)        | 0.74 (0.70, 0.83)     | 0.07 (0.02, 0.10)                       | 0.50 (0.23, 0.80)                  | 0.06 (0.02, 0.06) | 0.76 (0.64, 0.84)        | 0.78 (0.69, 0.86)     | 0.02 (0.00, 0.09)                       | 0.42 (0.18, 0.78)                  | 0.04 (0.01, 0.06) | 0.81 (0.65, 0.86)        | 0.83 (0.70, 0.87)     | 0.02 (0.00, 0.09)                       | 0.47 (0.14, 0.77)                  | 0.02 (0.01, 0.06) |
| <b>Myocardial infarction</b>  | 0.74 (0.68, 0.8)         | 0.80 (0.74, 0.84)     | 0.06 (0.02, 0.09)                       | 0.64 (0.40, 0.89)                  | 0.02 (0.02, 0.04) | 0.81 (0.64, 0.84)        | 0.83 (0.69, 0.86)     | 0.02 (0.01, 0.09)                       | 0.58 (0.23, 0.80)                  | 0.02 (0.01, 0.06) | 0.82 (0.65, 0.84)        | 0.84 (0.70, 0.86)     | 0.02 (0.00, 0.09)                       | 0.55 (0.14, 0.78)                  | 0.01 (0.01, 0.06) |
| <b>Heart failure</b>          | 0.70 (0.66, 0.79)        | 0.75 (0.71, 0.84)     | 0.06 (0.02, 0.09)                       | 0.43 (0.18, 0.84)                  | 0.04 (0.02, 0.06) | 0.80 (0.64, 0.84)        | 0.81 (0.69, 0.86)     | 0.01 (0.00, 0.09)                       | 0.34 (0.18, 0.78)                  | 0.03 (0.01, 0.06) | 0.84 (0.65, 0.86)        | 0.85 (0.70, 0.87)     | 0.01 (0.00, 0.09)                       | 0.36 (0.14, 0.77)                  | 0.01 (0.01, 0.06) |
| <b>All-cause mortality</b>    | 0.69 (0.64, 0.78)        | 0.71 (0.68, 0.83)     | 0.03 (0.01, 0.10)                       | 0.39 (0.22, 0.78)                  | 0.03 (0.02, 0.06) | 0.74 (0.65, 0.84)        | 0.75 (0.70, 0.85)     | 0.01 (0.00, 0.09)                       | 0.25 (0.14, 0.77)                  | 0.02 (0.01, 0.06) | 0.79 (0.65, 0.86)        | 0.79 (0.70, 0.87)     | 0.00 (0.00, 0.08)                       | 0.18 (0.07, 0.76)                  | 0.01 (0.00, 0.06) |

NRI= net reclassification improvement; IDI= integrated discrimination improvement.

\*For event during 5 years' follow-up

Model 1: Adjusted for age, gender, race, and clinic sites; Model 2: Model 1 plus ACC/AHA atherosclerotic cardiovascular disease risk factors: age, gender, race, clinical site, total cholesterol, high-density lipoprotein cholesterol, systolic blood pressure, treatment for hypertension (any antihypertensive medications), current cigarette smoking, and diabetes status;

Model 3: Model 2 plus education, body-mass index, physical activity, log-high sensitivity C-reactive protein, hemoglobin A1c, phosphate, log-high sensitivity troponin T, log-N-terminal pro-B-type natriuretic peptide, log-fibroblast growth factor-23, estimated-glomerular filtration rate, and log-24 hour urinary protein.
